# Supplementary material for: Legumain expression, activity and secretion are increased during monocyte-to-macrophage differentiation and inhibited by atorvastatin
Source: publisher site journal article supplement (doi:10.1515/hsz-2014-0172), 2014-09-02
Supplement: Supplementary file 1 [file hsz-2014-0172_Rev_Supplemenatry_Figures.docx]

**Legumain expression, activity and secretion are increased during monocyte-to-macrophage differentiation and inhibited by atorvastatin**

Rigmor Solberg, Robert Smith, Maria Almlöf, Eyassu Tewolde, Hilde Nilsen and Harald Thidemann Johansen

*Department of Pharmaceutical Biosciences, School of Pharmacy, University of Oslo, Norway*

**SUPPLEMENTARY DATA**

**Supplementary figure S1**

**Fig. S1. Legumain and cathepsin B mRNA levels are increased during monocyte-to-macrophage differentiation.** THP-1 cells (1.25 mill/ml) were treated with PMA (40 ng/ml, 24 h), washed (day 0), and cultured for up to 10 days. Total RNA (0.6-1 μg) was extracted, reverse transcribed and analysed by qRT-PCR. Values are normalised to internal controls (RPL0 and GAPDH) and presented as mean values ± SEM of fold-change compared to untreated control cells (n=3-6).

**Supplementary figure S2**

**Fig. S2.** The immunoblot in Fig. 1D stained with Ponceau. Total proteins (10 µg/lane) of cell lysates from PM treated with M-CSF (100 ng/ml; M2) or GM-CSF (10 ng/ml) and IFNγ (1 ng/ml) (M1) for 6 days, respectively (n=6).

**Supplementary figure S3**

**Fig. S3.** Concentrations of legumain in conditioned media from PM treated with M-CSF (100 ng/ml; M2) or GM-CSF (10 ng/ml) and IFNγ (1 ng/ml) (M1) for 6 days and measured by ELISA (n=6).

**Supplementary figure S4**

**Fig. S4. Atorvastatin inhibits cathepsin B activity in human PM-derived macrophages.**

Primary monocytes (PM) were isolated, stimulated with M-CSF (100 ng/ml) and cultured for 6 days. During the last 3 days the PM-derived macrophages were treated with 1–200 µM atorvastatin. Cathepsin B activity (∆F/s/µg total protein) in cell lysates was measured and normalized (± SEM) to untreated control (n=3).
